# Supplementary material for: Musical and psychomotor interventions for cognitive, sensorimotor, and cerebral decline in patients with Mild Cognitive Impairment (COPE): a study protocol for a multicentric randomized controlled study
Source: Springer Nature journal article supplement (doi:10.1186/s12877-022-03678-0), 2023-02-06
Supplement: MOESM1 [file 23997394]

## Supplementary Table 1: Prescreening procedure<sup>1</sup> to verify inclusion/exclusion criteria

| PRESCREENING STEP 1                                                                                                                                    |                                                                                                               |                                                                                                                                                                                                                                                                                                                                                                                                                                                                                                                                                                                                                                                                                                                                                                                                                                                                                                                                                                                                                                                   |
|--------------------------------------------------------------------------------------------------------------------------------------------------------|---------------------------------------------------------------------------------------------------------------|---------------------------------------------------------------------------------------------------------------------------------------------------------------------------------------------------------------------------------------------------------------------------------------------------------------------------------------------------------------------------------------------------------------------------------------------------------------------------------------------------------------------------------------------------------------------------------------------------------------------------------------------------------------------------------------------------------------------------------------------------------------------------------------------------------------------------------------------------------------------------------------------------------------------------------------------------------------------------------------------------------------------------------------------------|
| Hospital-provided data check                                                                                                                           | Action<br>Acquired & transmitted by the HUG & the CHUV                                                        | Data collection<br>Clinical functional and structural MRI<br>Behavioral data: Mini Mental State Examination (MMSE) [1], MoCA [2], Hospital Anxiety and Depression Scale (HADS) [3]                                                                                                                                                                                                                                                                                                                                                                                                                                                                                                                                                                                                                                                                                                                                                                                                                                                                |
| First contact with research team                                                                                                                       | Telephone call; decision to proceed to Pre-screening Step 2                                                   | Age – gender – musical and recent physical activity history – general health – native language – MRI compatibility – overall availability – contact information                                                                                                                                                                                                                                                                                                                                                                                                                                                                                                                                                                                                                                                                                                                                                                                                                                                                                   |
| PRESCREENING STEP 2                                                                                                                                    |                                                                                                               |                                                                                                                                                                                                                                                                                                                                                                                                                                                                                                                                                                                                                                                                                                                                                                                                                                                                                                                                                                                                                                                   |
| Summary information sheet & declaration of informed consent                                                                                            | Send/receive by post                                                                                          | Read the information sheet, read the declaration of informed consent and sign it before filling in any of the following questionnaires.                                                                                                                                                                                                                                                                                                                                                                                                                                                                                                                                                                                                                                                                                                                                                                                                                                                                                                           |
| Demographic questionnaire <sup>2</sup>                                                                                                                 | Send/receive by post                                                                                          | Laboratory-elaborated questionnaire (GEMMI lab): detailed information on <b>languages; handedness; physical capability to come to the interventions; health:</b> hospitalizations (causes), locomotion, vision (correction), audition (hearing aids), height & weight <sup>2</sup> , sleep quality; cardiovascular & neurological diseases, hypertension, diabetes, arthrosis, arthritis, rheumatism, bone fractures, thyroid problems, memory problems, other health problems; <b>fortuitous findings:</b> who (treating physician or patient) to contact; <b>smoking</b> habits over the lifespan; <b>alcohol consumption</b> over the lifespan; present <b>medication</b> ; other <b>drug use</b> ; <b>sociodemographic information:</b> age, gender, nationality, civil status, siblings, children, highest level of education (5 categories), main professional engagements, gross monthly household income <sup>3</sup> (5 categories); <b>MRI compatibility:</b> claustrophobia, implants, etc.; <b>Interest for the study:</b> motivation |
| Cognitive Reserve Index Questionnaire <sup>4</sup> [4]                                                                                                 | Send/receive by post                                                                                          | The CRIq includes demographic data and items grouped into three sections: education, working activity and leisure time, each of which returns a subscore                                                                                                                                                                                                                                                                                                                                                                                                                                                                                                                                                                                                                                                                                                                                                                                                                                                                                          |
| A-IADL-Q(SV) [5]                                                                                                                                       | Send/receive by post                                                                                          | The Amsterdam Instrumental Activity of the Daily Living Questionnaire (Short Version; (A-IADL-Q(SV)), examines proficiency in daily living activities                                                                                                                                                                                                                                                                                                                                                                                                                                                                                                                                                                                                                                                                                                                                                                                                                                                                                             |
| Music education questionnaires                                                                                                                         | Send/receive by post                                                                                          | Musical history laboratory-elaborated questionnaire (GEMMI lab): amount and intensity of music listening and extracurricular music training: solfege/theory, instrumental training, choir singing, intracurricular music training in school<br>Goldsmiths Musical Sophistication Index (Gold-MSI) [6]: self-report inventory for individual differences in musical sophistication (ability to engage with music)                                                                                                                                                                                                                                                                                                                                                                                                                                                                                                                                                                                                                                  |
| Godin-Shephard leisure-time physical activity questionnaire [7]                                                                                        | Send/receive by post                                                                                          | Adapted to cover physical activities in different parts of life (12-25 y.o., last 5 years and last year)                                                                                                                                                                                                                                                                                                                                                                                                                                                                                                                                                                                                                                                                                                                                                                                                                                                                                                                                          |
| Laboratory-elaborated questionnaire on major life events                                                                                               | Send/receive by post                                                                                          | Self-report inventory on stressful events that may influence cognitive functioning, covering 6 time periods (12-25 y.o., 25-55 y.o., 55-64 y.o.; last 10 years, last 5 years and last year); GEMMI lab                                                                                                                                                                                                                                                                                                                                                                                                                                                                                                                                                                                                                                                                                                                                                                                                                                            |
| PRESCREENING STEP 3                                                                                                                                    |                                                                                                               |                                                                                                                                                                                                                                                                                                                                                                                                                                                                                                                                                                                                                                                                                                                                                                                                                                                                                                                                                                                                                                                   |
| First laboratory visit                                                                                                                                 | Research team member countersigns declaration of informed consent<br>Verify/complete questionnaires of Step 2 |                                                                                                                                                                                                                                                                                                                                                                                                                                                                                                                                                                                                                                                                                                                                                                                                                                                                                                                                                                                                                                                   |
| - Psychometric tests<br>i. Right-handedness [8, 9]<br>ii. COGTEL <sup>8</sup> [10, 11]<br>iii. International Matrix Test (Oldenburg) <sup>6</sup> [12] | Pass 3 psychometric tests                                                                                     | i. Edinburgh Handedness Inventory (revised) to evaluate degree of right handedness; ii. Measure gross overall cognitive level and check for potential (mild) cognitive decline (COGTEL); iii. Check for major hearing impairment.                                                                                                                                                                                                                                                                                                                                                                                                                                                                                                                                                                                                                                                                                                                                                                                                                 |

### Footnotes Table 2

- Outliers (based on cut-off scores and or other exclusion criteria) for the tests of Pre-screening Step 1, 2 & 3 are excluded progressively from the study; the declaration of informed consent will be destroyed
- Allows to compute the Body Mass Index (BMI), obese people are excluded (BMI > 30), as obesity impacts on brain (shrinkage) [13]
- Adapted to Switzerland and France
- Cognitive reserve is the resilience to neuro-pathological damage in older adults [14].
- The COGTEL test provides a global measure of cognitive function, it comprises 6 subtests covering prospective memory, short- and long-term verbal memory, working memory (digit span), verbal fluency and inductive reasoning.
- The first stage of the International Matrix Test (Oldenburg) assesses intelligibility and understanding of speech and allows to check for major hearing impairment

1. Folstein MF, Folstein SE, McHugh PR: **"Mini-Mental State": A practical method for grading the cognitive state of patients for the clinician.** *J Psychiatr Res* 1975, **12**:189–198.
2. Trzepacz PT, Hochstetler H, Wang S, Walker B, Saykin AJ, Alzheimer's Disease Neuroimaging I: **Relationship between the Montreal Cognitive Assessment and Mini-mental State Examination for assessment of mild cognitive impairment in older adults.** *BMC Geriatr* 2015, **15**:107.
3. Zigmond AS, Snaith RP: **The hospital anxiety and depression scale.** *Acta Psychiatr Scand* 1983, **67**(6):361-370.
4. Nucci M, Mapelli D, Mondini S: **Cognitive Reserve Index questionnaire (CRIq): a new instrument for measuring cognitive reserve.** *Aging clinical and experimental research* 2012, **24**(3):218-226.
5. Jutten RJ, Peeters CFW, Leijdesdorff SMJ, Visser PJ, Maier AB, Terwee CB, Scheltens P, Sikkes SAM: **Detecting functional decline from normal aging to dementia: Development and validation of a short version of the Amsterdam IADL Questionnaire.** *Alzheimers Dement (Amst)* 2017, **8**:26-35.
6. Mullensiefen D, Gingras B, Musil J, Stewart L: **The musicality of non-musicians: an index for assessing musical sophistication in the general population.** *PloS one* 2014, **9**(2):e89642.
7. Amireault S, Godin G: **The Godin-Shephard leisure-time physical activity questionnaire: validity evidence supporting its use for classifying healthy adults into active and insufficiently active categories.** *Percept Mot Skills* 2015, **120**(2):604-622.
8. Oldfield RC: **The assessment and analysis of handedness: the Edinburgh inventory.** *Neuropsychologia* 1971, **9**(1):97-113.
9. Veale JF: **Edinburgh handedness inventory—short form: a revised version based on confirmatory factor analysis.** *Laterality: Asymmetries of Body, Brain and Cognition* 2014, **19**(2):164-177.
10. Ihle A, Gouveia ER, Gouveia BR, Kliegel M: **The Cognitive Telephone Screening Instrument (COGTEL): A Brief, Reliable, and Valid Tool for Capturing Interindividual Differences in Cognitive Functioning in Epidemiological and Aging Studies.** *Dement Geriatr Cogn Dis Extra* 2017, **7**(3):339-345.
11. Breitling LP, Wolf M, Muller H, Raum E, Kliegel M, Brenner H: **Large-scale application of a telephone-based test of cognitive functioning in older adults.** *Dementia and geriatric cognitive disorders* 2010, **30**(4):309-316.
12. Kollmeier B, Warzybok A, Hochmuth S, Zokoll MA, Uslar V, Brand T, Wagener KC: **The multilingual matrix test: Principles, applications, and comparison across languages: A review.** *International Journal of Audiology* 2015, **54**(sup2):3-16.
13. Hamer M, Batty GD: **Association of body mass index and waist-to-hip ratio with brain structure: UK Biobank study.** *Neurology* 2019, **92**(6):e594-e600.
14. Tucker AM, Stern Y: **Cognitive reserve in aging.** *Current Alzheimer research* 2011, **8**(4):354-360.
