# Supplementary material for: Musical and psychomotor interventions for cognitive, sensorimotor, and cerebral decline in patients with Mild Cognitive Impairment (COPE): a study protocol for a multicentric randomized controlled study
Source: Springer Nature journal article supplement (doi:10.1186/s12877-022-03678-0), 2023-02-06
Supplement: MOESM2 [file 23997394]

**Supplementary Table 2: Behavioral Battery (psychometric tests)**  
 Measured at all 3 time points: t0: baseline; t1: 3 months; t2: 6 months  
 COGTEL & A-IADL-Q(SV) applied before t0, then at t1 and t2

| <b>BASIC COGNITION</b>                                                                   |                                                                               |                                                     |
|------------------------------------------------------------------------------------------|-------------------------------------------------------------------------------|-----------------------------------------------------|
| Visual processing speed & Attention                                                      | d2-R test                                                                     | Brickenkamp and Zillmer 1998 [1, 2]                 |
| Visual processing speed, Shifting & Hand motor skill                                     | Trail Making Test A & B                                                       | Strauss et al., 2006 [3]                            |
| <b>EXECUTIVE CONTROL</b>                                                                 |                                                                               |                                                     |
| Inhibition                                                                               | Go/No-Go                                                                      | Enge et al., 2014 [4]                               |
| [Visual working memory (2-back)]                                                         | fMRI in-scanner task                                                          | Migo et al, 2015 [5]]                               |
| <b>AUDITIVE COGNITION</b>                                                                |                                                                               |                                                     |
| Speech-in-noise perception                                                               | International Matrix Test (Oldenburg)                                         | Kollmeier et al., 2015 [6]                          |
| <b>PERCEPTUAL MOTOR SKILL</b>                                                            |                                                                               |                                                     |
| Visuo-manual aptitude                                                                    | Purdue Pegboard                                                               | Tiffin and Asher, 1948 [7]                          |
| Visuo-construction, fine motor control, memory and executive functions                   | The Clock Drawing Test                                                        | Aprahamian et al., 2009 [8]                         |
| Assessing right/left judgements of photos of body parts on a tablet                      | Laterality recognition test (evaluates the representation of the body schema) | Williams at al., 2019 [9]                           |
| Whole body balance                                                                       | Unipedal balance test                                                         | Bohannon and Tudini, 2018 [10]                      |
| <b>OTHER</b>                                                                             |                                                                               |                                                     |
| Well-being                                                                               | WHOQOL-BREF*                                                                  | WHO, 1996 [11]                                      |
| Autonomy in daily living activities                                                      | A-IADL-Q(SV)**                                                                | Jutten et al., 2017 [12]                            |
| Emotional Regulation                                                                     | ERQ                                                                           | Christophe et al, 2009 [13]                         |
| <b>MAIN SCORE OF COGNITIVE FUNCTION</b>                                                  | COGTEL test                                                                   | Breitling et al., 2010; Ihle et al., 2017; [14, 15] |
| *World Health Organization Quality of Life-BREF (BREF for abbreviated)                   |                                                                               |                                                     |
| ** The Amsterdam Instrumental Activity of the Daily Living Questionnaire (Short Version) |                                                                               |                                                     |

1. Brickenkamp R, Zillmer E: **The d2 Test of Attention. 1998. Goettingen, Hogrefe 1998.**
2. Brickenkamp R, Schmidt-Atzert L, Liepmann D: **Test d2-Revision: Aufmerksamkeits- und Konzentrationstest:** Hogrefe Göttingen; 2010.
3. Strauss PPE, Strauss E, Sherman NAAPDPCNEMS, Sherman EMS, Spreen O: **A Compendium of Neuropsychological Tests: Administration, Norms, and Commentary:** Oxford University Press; 2006.
4. Enge S, Behnke A, Fleischhauer M, Kuttler L, Kliegel M, Strobel A: **No evidence for true training and transfer effects after inhibitory control training in young healthy adults.** *J Exp Psychol Learn Mem Cogn* 2014, **40**(4):987-1001.
5. Migo EM, Mitterschiffthaler M, O'Daly O, Dawson GR, Dourish CT, Craig KJ, Simmons A, Wilcock GK, McCulloch E, Jackson SH *et al*: **Alterations in working memory networks in amnesic mild cognitive impairment.** *Neuropsychol Dev Cogn B Aging Neuropsychol Cogn* 2015, **22**(1):106-127.
6. Kollmeier B, Warzybok A, Hochmuth S, Zokoll MA, Uslar V, Brand T, Wagener KC: **The multilingual matrix test: Principles, applications, and comparison across languages: A review.** *International Journal of Audiology* 2015, **54**(sup2):3-16.
7. Tiffin J, Asher EJ: **The Purdue Pegboard: Norms and studies of reliability and validity.** *Journal of Applied Psychology* 1948, **32**:234–247.
8. Aprahamian I, Martinelli JE, Neri AL, Yassuda MS: **The Clock Drawing Test: A review of its accuracy in screening for dementia.** *Dement Neuropsychol* 2009, **3**(2):74-81.

9. Williams LJ, Braithwaite FA, Leake HB, McDonnell MN, Peto DK, Moseley GL, Hillier SL: **Reliability and validity of a mobile tablet for assessing left/right judgements.** *Musculoskeletal Science and Practice* 2019, **40**:45-52.
10. Bohannon RW, Tudini F: **Unipedal balance test for older adults: a systematic review and meta-analysis of studies providing normative data.** *Physiotherapy* 2018, **104**(4):376-382.
11. Organization WH: **WHOQOL-BREF: introduction, administration, scoring and generic version of the assessment: field trial version, December 1996.** In.: World Health Organization; 1996.
12. Jutten RJ, Peeters CFW, Leijdesdorff SMJ, Visser PJ, Maier AB, Terwee CB, Scheltens P, Sikkes SAM: **Detecting functional decline from normal aging to dementia: Development and validation of a short version of the Amsterdam IADL Questionnaire.** *Alzheimers Dement (Amst)* 2017, **8**:26-35.
13. Christophe V, Antoine P, Leroy T, Delelis G: **Évaluation de deux stratégies de régulation émotionnelle: la suppression expressive et la réévaluation cognitive.** *European review of applied psychology* 2009, **59**(1):59-67.
14. Breitling LP, Wolf M, Muller H, Raum E, Kliegel M, Brenner H: **Large-scale application of a telephone-based test of cognitive functioning in older adults.** *Dementia and geriatric cognitive disorders* 2010, **30**(4):309-316.
15. Ihle A, Gouveia ER, Gouveia BR, Kliegel M: **The Cognitive Telephone Screening Instrument (COGTEL): A Brief, Reliable, and Valid Tool for Capturing Interindividual Differences in Cognitive Functioning in Epidemiological and Aging Studies.** *Dement Geriatr Cogn Dis Extra* 2017, **7**(3):339-345.
